# Supplementary material for: Staphylococcus aureus Biofilms and Their Response to a Relevant in vivo Iron Source
Source: Front Microbiol. 2020 Dec 21;11:509525. doi: 10.3389/fmicb.2020.509525 (PMC7779473; doi:10.3389/fmicb.2020.509525)
Supplement: Supplementary file 6 [file Data_Sheet_1.xlsx]

## Sheet: Figure 1 A
	R												2 M FeCl3												0.5 M Hb												40 M FeCl3												10 M Hb
3 h	0.05	0.01	0.02	0.01	0.09	0.1	0.1	0.09	0.13	0.13	0.16	0.1	0.013	0.006	0.008	0.035	0.111	0.079	0.081	0.074	0.099	0.137	0.105	0.093	0.022	0.028	0.033	0.046	0.07	0.079	0.065	0.074	0.122	0.113	0.096	0.089	0.03	0.007	0.016	0.039	0.103	0.134	0.095	0.075	0.135	0.11	0.147	0.108	0.033
6 h	0.019	0.027	0.02	0.014	0.093	0.072	0.108	0.079	0.031	0.055	0.031	0.039	0.022	0.011	0.011	0.016	0.085	0.038	0.038	0.046	0.012	0.01	0.019	0.011	0.058	0.041	0.05	0.043	0.069	0.06	0.062	0.052	0.065	0.045	0.04	0.037	-0.016	-0.015	0.006	0.009	0.062	0.036	0.044	0.041	0.04	0.035	0.019	0.005	0.027
9 h	0.015	0.017	0.028	0.025	0.095	0.089	0.059	0.055	0.047	0.092	0.061	0.062	0.082	0.026	0.035	0.021	0.055	0.058	0.022	0.04	0.048	0.058	0.056	0.044	0.084	0.055	0.05	0.076	0.113	0.124	0.071	0.07	0.089	0.043	0.045	0.065	0.039	-0.001	0.003	0.006	0.068	0.037	0.032	0.041	0.06	0.063	0.06	0.052	0.078
24 h	0.081	0.095	0.114	0.09	0.052	0.074	0.057	0.042	0.199	0.178	0.151	0.073	0.037	0.065	0.071	0.073	0.042	0.046	0.081	0.075	0.137	0.086	0.108	0.083	0.118	0.108	0.081	0.111	0.13	0.1	0.104	0.137	0.161	0.158	0.116	0.097	0.069	0.054	0.066	0.068	0.052	0.112	0.053	0.061	0.199	0.134	0.137	0.117	0.197
	DMMB absorbance (measured at 650 nm) representing biofilm matrix,with media alone subtracted from samples
[truncated: 11 more columns]

## Sheet: Figure 1 B
	fur 6h												Newman 6h												fur 24h												Newman 24h
R	0.069	0.046	0.071	0.117	0.098	0.083	0.098	0.081	-0.001	0.083	0.083	0.012	0.019	0.027	0.02	0.014	0.093	0.072	0.108	0.079	0.031	0.055	0.031	0.039	0.14	0.119	0.268	0.131	0.157	0.108	0.118	0.111	0.043	0.054	0.093	0.09	0.081	0.095	0.114	0.09	0.052	0.074	0.057	0.042	0.199	0.178	0.151	0.073
inorganic iron	0.198	0.139	0.207	0.106	0.045	0.096	0.101	0.087	0.026	0.037	0.033	0.041	-0.016	-0.015	0.006	0.009	0.062	0.036	0.044	0.041	0.04	0.035	0.019	0.005	0.18	0.141	0.153	0.107	0.131	0.114	0.121	0.121	0.016	0.037	0.023	0.033	0.069	0.054	0.066	0.068	0.052	0.112	0.053	0.061	0.199	0.134	0.137	0.117
haemoglobin	0.136	0.096	0.116	0.122	0.068	0.09	0.111	0.076	0.026	0.028	0.031	0.031	0.027	0.031	0.079	0.132	0.079	0.113	0.08	0.065	0.039	0.045	0.047	0.041	0.243	0.263	0.258	0.302	0.228	0.185	0.161	0.183	0.126	0.185	0.2	0.165	0.197	0.168	0.19	0.162	0.23	0.226	0.236	0.269	0.272	0.348	0.26	0.146
	DMMB absorbance (measured at 650 nm) representing biofilm matrix,with media alone subtracted from samples

## Sheet: Figure 1 C
	R												2 M FeCl3												0.5 M Hb												40 M FeCl3												10 M Hb
0 h	0.07	0.07	0.085	0.092	0.282	0.169	0.128	0.129	0.11	0.133	0.137	0.152	0.068	0.097	0.078	0.098	0.169	0.135	0.134	0.179	0.101	0.128	0.136	0.136	0.105	0.149	0.154	0.131	0.141	0.116	0.102	0.087	0.067	0.091	0.117	0.191	0.126	0.117	0.104	0.107	0.127	0.134	0.16	0.175	0.155	0.195	0.187	0.283	0.136
1.75 h	0.118	0.12	0.078	0.066	0.104	0.14	0.123	0.108	0.137	0.136	0.108	0.112	0.119	0.078	0.088	0.083	0.081	0.083	0.073	0.07	0.146	0.128	0.097	0.085	0.121	0.148	0.18	0.13	0.136	0.158	0.164	0.157	0.179	0.157	0.157	0.139	0.068	0.156	0.061	0.133	0.137	0.152	0.11	0.097	0.084	0.1	0.069	0.072	0.164
3.5 h	0.117	0.116	0.13	0.098	0.043	0.101	0.032	0.096	0.131	0.155	0.099	0.1	0.092	0.083	0.097	0.101	0.071	0.046	0.097	0.046	0.14	0.14	0.099	0.072	0.134	0.139	0.119	0.112	0.135	0.156	0.206	0.124	0.293	0.146	0.147	0.153	0.094	0.093	0.127	0.094	0.105	0.128	0.089	0.072	0.131	0.081	0.121	0.079	0.161
5.25 h	0.116	0.114	0.137	0.121	0.108	0.086	0.078	0.071	0.097	0.164	0.155	0.127	0.104	0.112	0.139	0.134	0.09	0.057	0.1	0.079	0.09	0.107	0.112	0.075	0.142	0.173	0.164	0.235	0.127	0.13	0.144	0.14	0.18	0.185	0.147	0.13	0.155	0.113	0.086	0.087	0.046	0.067	0.109	0.052	0.138	0.12	0.109	0.062	0.22
7.25 h	0.069	0.038	0.072	0.065	0.089	0.087	0.065	0.086	0.066	0.15	0.116	0.114	0.054	0.044	0.07	0.055	0.092	0.069	0.074	0.07	0.116	0.115	0.044	0.065	0.1	0.101	0.095	0.118	0.138	0.108	0.105	0.101	0.162	0.111	0.109	0.156	0.131	0.061	0.072	0.077	0.078	0.076	0.103	0.113	0.092	0.061	0.065	0.068	0.219
	DMMB absorbance (measured at 650 nm) representing biofilm matrix,with media alone subtracted from samples
[truncated: 11 more columns]

## Sheet: Figure 1 D
	Newman												BC03												EC12
R	0.081	0.095	0.114	0.09	0.052	0.074	0.057	0.042	0.199	0.178	0.151	0.073	0.087	0.114	0.092	0.22	0.042	0.064	0.064	0.056	0.091	0.036	0.138	0.085	0.139	0.079	0.112	0.201	0.091	0.101	0.146	0.086	0.014	-0.031	-0.019	0.05
2 M FeCl3	0.037	0.065	0.071	0.073	0.042	0.046	0.081	0.075	0.137	0.086	0.108	0.083	0.06	0.087	0.088	0.112	0.026	0.053	0.03	0.027	0.124	0.136	0.091	0.117	0.116	0.065	0.086	0.13	0.111	0.103	0.103	0.105	0.058	0.005	0.019	0.014
0.5 M Hb	0.118	0.108	0.081	0.111	0.13	0.1	0.104	0.137	0.161	0.158	0.116	0.097	0.148	0.106	0.126	0.144	0.081	0.074	0.089	0.073	0.098	0.251	0.174	0.122	0.167	0.099	0.097	0.115	0.14	0.148	0.184	0.161	0.078	0.028	-0.002	0.073
40 M FeCl3	0.069	0.054	0.066	0.068	0.052	0.112	0.053	0.061	0.199	0.134	0.137	0.117	0.06	0.06	0.095	0.053	0.037	0.027	0.032	0.045	0.117	0.087	0.115	0.13	0.092	0.131	0.076	0.098	0.133	0.102	0.081	0.078	0.09	0.018	0.063	0.059
10 M Hb	0.197	0.168	0.19	0.162	0.23	0.226	0.236	0.269	0.272	0.348	0.26	0.146	0.091	0.114	0.151	0.196	0.1	0.154	0.105	0.108	0.345	0.254	0.21	0.141	0.153	0.111	0.107	0.051	0.249	0.269	0.131	0.206	0.2	0.193	0.106	0.125
	DMMB absorbance (measured at 650 nm) representing biofilm matrix,with media alone subtracted from samples

## Sheet: Figure 3, 5 and S3
	agrB			RNAIII			ftn			isdB			hrtA			fur			psm			psm			ldh1
0.5 M Hb	1.17	1.2	1.19	1.36	0.924	1.5	0.729	1.08	0.932	1.16	1.08	0.956	0.819	0.951	0.944	1.46	1.52	1.09	0.386	0.816	0.241	1.63	0.982	1.34	1	0.965	1.54
10 M Hb	0.581	0.525	0.779	0.29	0.287	0.671	1.91	1.83	0.917	0.968	0.875	1.09	6.54	6.01	8.23	1.05	1.12	1.09	0.743	1.5	1.99	0.239	0.396	0.973	0.518	0.595	0.682
2 M FeCl3	1.53	0.996	0.848	2.15	1.12	1.23	0.913	0.915	1.11	0.975	0.941	0.986	0.868	0.732	0.476	0.734	0.933	1.03	1.03	0.605	1.49	2.5	0.98	0.517	1.04	1.17	0.968
40 M FeCl3	1.31	2.05	1.66	1.51	3.34	0.495	1.39	1.3	1.16	0.701	0.952	0.878	0.428	0.411	0.696	1.16	1.15	0.826	1.36	1.76	0.612	1.3	4.5	1.02	1.44	1.12	0.966
R	0.731	0.778	0.765	0.778	1.01	1.64	0.569	0.423	0.908	1.31	1.18	1.11	0.502	0.582	0.389	0.761	0.55	0.989	2.47	0.769	2.28	0.787	0.583	1.46	1.29	1.33	1.02
	Relative Gene Expression (to an overall average) values provided by software qbasePLUS , normalised to five reference genes

## Sheet: Figure 4
	agrB			RNAIII			ftn			isdB			hrtA			fur
0.5 M Hb	1.28	1.41	1.34	1.28	1.22	1.2	1.07	1.57	1.3	0.866	0.801	0.902	0.924	17.2	13	1.23	1.03	0.756
10 M Hb	0.984	1.47	1.69	0.981	1.05	1.04	0.984	2.62	2.47	0.962	0.694	0.286	2.71	39.1	47.4	1.21	1.12	0.843
2 M FeCl3	0.811	1.02	0.874	0.952	1.02	0.672	0.727	1.41	0.923	0.978	0.409	0.547	0.663	0.124	0.104	0.772	0.669	0.868
40 M FeCl3	1.17	0.802	1.09	0.963	0.532	0.64	1.87	1.38	2.12	0.521	0.194	0.442	0.863	0.0725	0.0936	1.11	0.696	0.87
R	0.835	0.589	0.463	0.868	1.44	1.87	0.699	0.125	0.159	2.36	22.7	16.1	0.699	0.166	0.166	0.793	1.86	2.08
	Relative Gene Expression (to an overall average) values provided by software qbasePLUS , normalised to five reference genes

## Sheet: Figure 6
BC03	agrII			RNAIII			ftn			isdB			hrtA			fur			psm			psm			ldh1
0.5 M Hb	0.829	1.24	0.995	1.06	1.17	1.35	1.67	1.62	2.01	0.78	1.54	0.603	1.17	1.04	0.785	0.898	1.14	1.72	2.41	1.57	0.814	1.37	1.57	1.27	2.26	1.27	0.878
10 M Hb	1.29	0.803	1.15	0.847	0.774	0.712	2.03	1.25	1.62	0.873	0.705	0.815	7.32	5.66	5.72	1.12	0.835	1.02	0.657	1.4	1.38	0.964	1.23	1.46	1.38	1.77	1.41
2 M FeCl3	1.14	0.944	1.22	1.25	1.38	1.48	1.3	2.68	2.88	0.793	1.19	0.577	0.42	0.538	0.508	1.08	0.857	1.88	2.21	1.1	1.82	1.67	1.08	1.55	0.262	0.774	0.584
40 M FeCl3	1.12	0.912	0.914	0.776	0.672	0.633	2.77	1.25	1.16	0.597	0.324	0.663	0.485	0.409	0.528	0.838	0.913	0.175	0.151	0.305	0.625	0.571	0.774	0.62	1.01	1.46	3.37
R	0.736	1.17	0.787	1.15	1.2	1.12	0.0819	0.148	0.0922	3.1	2.4	5.32	0.575	0.775	0.831	1.1	1.34	1.74	1.9	1.35	0.781	0.797	0.619	0.565	1.21	0.398	0.411
EC12	agrB			RNAIII			ftn			isdB			hrtA			fur			psm			psm			ldh1
0.5 M Hb	1.14	1.13	1.29	0.972	1.03	1.08	1.68	1.69	0.929	0.691	0.81	0.44	0.774	0.913	0.87	0.944	0.872	0.648	1.1	1.75	1.45	0.953	1.54	1.58	0.996	0.841	1.41
10 M Hb	0.994	1.1	1.08	1.03	1.34	1.12	1.35	2.24	1.97	1.19	0.748	0.49	9.11	8.21	3.95	1.29	1.53	0.691	0.824	1.6	1.47	1.4	1.96	2.05	1.29	1.73	1.72
2 M FeCl3	1.22	1.04	0.935	1.41	1.15	1.08	1.69	1.68	1.12	0.724	0.719	0.342	0.559	0.56	0.883	0.923	0.856	0.478	1.22	1.47	1.01	1.29	1.42	1.1	0.799	0.682	0.862
40 M FeCl3	0.846	1.14	1.28	0.857	1.13	1.84	1.22	1.93	2.44	0.86	0.779	0.265	0.374	0.311	0.541	1.07	1.45	8.02	1.43	1.27	3.91	0.916	1.21	2.63	1.01	2.68	1.24
R	0.859	0.682	0.599	0.826	0.56	0.418	0.214	0.0815	0.2	1.96	2.95	51.2	0.678	0.766	0.609	0.835	0.607	0.583	0.634	0.191	0.119	0.632	0.194	0.107	0.966	0.376	0.387
	Relative Gene Expression (to an overall average) values provided by software qbasePLUS , normalised to five reference genes
